# Supplementary material for: Modeling lung perfusion abnormalities to explain early COVID-19 hypoxemia
Source: PubMed Central journal article supplement (PMC7522238; doi:10.1038/s41467-020-18672-6), 2020-09-28
Supplement: 41467_2020_18672_MOESM1_ESM.pdf [file 41467_2020_18672_MOESM1_ESM.pdf]

1           **Modeling Lung Perfusion Abnormalities to Explain Early COVID-19 Hypoxemia**

2

3

**Supplementary Information**

4

5                   Jacob Herrmann<sup>1\*</sup>, Vitor Mori<sup>2</sup>, Jason H.T. Bates<sup>2</sup>, Béla Suki<sup>1</sup>

6

7           <sup>1</sup>Dept. of Biomedical Engineering, Boston University, Boston, MA, USA

8           <sup>2</sup>Dept. of Medicine, University of Vermont, Burlington, VT, USA

9           \* Corresponding Author

10

11

12

## 13 **Supplementary Discussion**

### 14 *Consequences of perfusion defect and perfusion defect*

15 To accompany Figure 4 in the main text, a more comprehensive analysis of the  
16 contribution of perfusion defect to hypoxemia in the model is provided herein. In this  
17 supplementary analysis, two scenarios are explored: Supplementary Figs. 1 to 4 as well as Figure  
18 4 in the main text pertain to the original modeling scenario of a patient upon admission, with  $F_{inj}$   
19 ranging between 0% to 30%, inspired oxygen fraction  $F_iO_2 = 21\%$ , and mixed venous oxygen  
20 tension  $P_vO_2 = 40$  mmHg; Supplementary Figs. 5 to 9 describe the scenario of a critical care  
21 patient, with  $F_{inj}$  ranging up to 80%,  $F_iO_2 = 40\%$ , and  $P_vO_2 = 25$  mmHg. The model outcomes  
22 reported here include the ratio of arterial oxygen tension ( $P_aO_2$ ) to inspired oxygen fraction  
23 ( $F_iO_2$ ) in Supplementary Figs. 1 and 5; arterial oxygen saturation ( $S_aO_2$ ) in Supplementary Figs.  
24 2 and 6; the calculated shunt fraction ( $F_{shu}$ ) in Supplementary Figs. 3 and 7; the  $F_{shu}:F_{inj}$  ratio in  
25 Supplementary Fig. 8 (see also Figure 4 in the main text); and the pulmonary vascular resistance  
26 (PVR) in Supplementary Figs. 4 and 9.

27 Note that all of these outcomes—except PVR—are insensitive to the amount of perfusion  
28 defect when the perfusion defect is distributed uniformly in the model, without preference for  
29 injured vs. noninjured compartments. Generally, oxygenation improves when perfusion defect  
30 preferentially occurs in the injured lung, and worsens when perfusion defect occurs in the  
31 noninjured lung. Also note that  $P_aO_2:F_iO_2$  ratios below 200 are not observed in the early stage  
32 model reported in the main text due to  $F_iO_2 = 21\%$  and  $P_vO_2 = 40$  mmHg (yielding at least  
33  $P_aO_2:F_iO_2 = 190$  mmHg even with 100% shunt). Modifying parameters to represent a critical  
34 care patient with  $F_iO_2 = 40\%$  and  $P_vO_2 = 25$  mmHg results in  $P_aO_2:F_iO_2$  ratios as low as 63  
35 mmHg, with especially low ratios when HPV is not normally functioning in the injured lung

36 compartments representing pulmonary shunt. Finally, note that perfusion defect results in  
37 increased PVR in nearly every simulated condition unless balanced by vasodilation in the  
38 reversed HPV model.

39 Effects of increased inspired oxygen fraction on hypoxemia

40 Patients with hypoxia are often administered supplemental oxygen, which can improve  
41 oxygenation of blood in regions with low ventilation:perfusion ratio. In our model, the inspired  
42 oxygen fraction ( $F_iO_2$ ) was set between 21% and 100%. Similar to Figure 2 in the main text, the  
43 reversed HPV model was characterized by 72% reduction in vascular resistance of the injured  
44 regions, and baseline gravitational gradients of perfusion were set at 30%. In addition to the  
45 reference case without any perfusion defect (PD) or venous admixture (VA) in the noninjured  
46 lung compartments (Supplementary Fig. 10), we also included cases for PD = 60% representing  
47 thrombosis mediated perfusion defects, and VA = 37% representing severe ventilation-perfusion  
48 mismatching (Figure 7 in the main text).

49 Supplementary Figure 10 demonstrates that the model with pulmonary shunt in the injured  
50 lung compartments can exhibit both improving and worsening  $P_aO_2:F_iO_2$  ratio as  $F_iO_2$  increases,  
51 depending on the range of  $F_iO_2$  and extent of injury. In general,  $P_aO_2:F_iO_2$  and  $F_iO_2$  are negatively  
52 correlated at low  $F_iO_2$  and high  $F_{inj}$ , and positively correlated at high  $F_iO_2$  and low  $F_{inj}$ . This may  
53 be attributed to the nonlinear nature of the oxygen-hemoglobin dissociation curve. Hemoglobin  
54 becomes fully saturated at blood oxygen tension around 100 mmHg, after which increasing  $F_iO_2$   
55 primarily increases the amount of dissolved oxygen gas. When shunted and oxygenated blood  
56 combine, a large amount of dissolved oxygen binds to unoccupied hemoglobin, and the oxygen  
57 tension of the mixed arterial blood is greatly reduced. Thus increasing  $F_iO_2$  in a model of  
58 pulmonary shunt yields diminishing gains in  $P_aO_2$ , at least until the oxygenated blood is

59 sufficiently oxygen-rich such that all hemoglobin remain fully saturated after mixing with shunted  
60 blood. This can be observed in Supplementary Fig. 10: the turning point at which increasing  $F_iO_2$   
61 changes from negative to positive correlation with the  $P_aO_2:F_iO_2$  ratio coincides with the  $F_iO_2$  at  
62 which  $S_aO_2$  reaches 100%. In cases with  $F_{inj} > 50\%$ , this may never occur even with  $F_iO_2 = 100\%$ .

63 Note that in Supplementary Fig. 10, the ratio  $F_{shu}:F_{inj}$  is insensitive to changes in  $F_iO_2$ . By  
64 comparison,  $F_{shu}:F_{inj}$  decreases with increasing  $F_iO_2$  in the model of noninjured venous admixture  
65 due to ventilation-perfusion mismatching. This is because lung regions with low  
66 ventilation:perfusion ratio may in fact saturate hemoglobin and sufficiently oxygenate blood at  
67 very high  $F_iO_2$  levels, since nitrogen in alveolar gas becomes almost entirely replaced by oxygen.  
68 Hypoxemia caused by lung regions of complete pulmonary shunt (i.e., with zero  
69 ventilation:perfusion ratio) is not responsive to changes in  $F_iO_2$ , as shown in Supplementary Fig.  
70 10.

#### 71 Interplay between mixed venous oxygen tension and hypoxic pulmonary vasoconstriction

72 Venovenous extracorporeal membrane oxygenation (V-V ECMO) removes deoxygenated  
73 blood from the systemic venous system, oxygenates the blood through a membrane, and returns  
74 the blood back into the systemic venous system. This invasive intervention enhances the oxygen  
75 content of mixed venous blood and may reduce ventilatory demand for critical care patients in  
76 need of respiratory support. Hypoxic pulmonary vasoconstriction (HPV) normally constricts  
77 pulmonary arterioles in lung regions with poor oxygenation, such as pulmonary shunt. If a patient  
78 with pulmonary shunt is placed on V-V ECMO, it is possible that normal HPV feedback may be  
79 destimulated due to increased mixed venous oxygen tension ( $P_vO_2$ ). This could potentially result  
80 in increased perfusion to lung regions with poor ventilation and worsen ventilation-perfusion  
81 matching.

82 In our model, the potential interplay between HPV and V-V ECMO was explored using  
83  $P_vO_2$  ranging between 20 to 100 mmHg. The inspired oxygen fraction ( $F_iO_2$ ) was set at 60%.  
84 Similar to Figure 2 in the main text, the reversed HPV model was characterized by 72% reduction  
85 in vascular resistance of the injured regions, and baseline gravitational gradients of perfusion were  
86 set at 30%. In addition to the reference case without any perfusion defect (PD) or venous  
87 admixture (VA) in the noninjured lung compartments, we also included cases for PD = 60%  
88 representing thrombosis-mediated perfusion defect, and VA = 37% representing severe  
89 ventilation-perfusion mismatching.

90 The results in Supplementary Fig. 11 demonstrate that normal HPV function in the injured  
91 lung compartment (blue) can compensate for a small amount of pulmonary shunt ( $F_{inj} = 17\%$ ),  
92 restoring a normal value of the  $P_aO_2:F_iO_2$  ratio if there is no perfusion defect or ventilation-  
93 perfusion mismatching. By comparison, impaired HPV (red) results in  $P_aO_2:F_iO_2 < 300$  mmHg  
94 for any  $P_vO_2 < 60$  mmHg. When a large amount of perfusion defect is included in the model, total  
95 pulmonary vascular resistance increases, and a disproportionate amount of perfusion is redirected  
96 through the injured lung compartments. In this case, normal HPV function is unable to maintain  
97  $P_aO_2:F_iO_2 > 300$  mmHg, yet still maintains better oxygenation ( $P_aO_2:F_iO_2$  between 100 to 200  
98 mmHg) compared to impaired HPV ( $P_aO_2:F_iO_2 < 100$  mmHg) at low  $P_vO_2 < 60$  mmHg. However,  
99 when ventilation-perfusion mismatching yields 37% venous admixture in the noninjured lung  
100 compartments, HPV within the injured compartments is ineffective at preventing hypoxemia.  
101 Note that  $F_{shu}:F_{inj}$  ratios are very high for the case with VA = 37%, even in the normal HPV model,  
102 because the calculated shunt fraction primarily reflects the venous admixture from the noninjured  
103 lung rather than the 17% injured fraction.

104 In all cases, the calculated shunt fraction increases in the normal HPV model as  $P_vO_2$   
105 increases, until the normal HPV and impaired HPV models are indistinguishable at  $P_vO_2 > 70$   
106 mmHg. If the benefit of V-V ECMO in the normal HPV model is assessed by arterial  
107 oxygenation alone (i.e.,  $P_aO_2:F_iO_2$  and  $S_aO_2$ ), then it may seem as though increasing venous  
108 oxygenation results in apparently worse patient condition when  $P_vO_2$  is in the range of 20 to 40  
109 mmHg, and when there is no venous admixture in the noninjured lung. This drop in arterial  
110 oxygenation with increasing  $P_vO_2$  may be attributed to relaxation of HPV. However as  $P_vO_2$   
111 further increases above 40 mmHg, arterial oxygenation metric rise and indicate improved patient  
112 condition. In the model of ventilation-perfusion mismatching with VA = 37%, V-V ECMO is  
113 beneficial at all levels of  $P_vO_2$ . Note although arterial oxygenation improves for  $P_vO_2 > 40$   
114 mmHg, there may be adverse consequences for hypercapnia if CO<sub>2</sub> is not sufficiently eliminated  
115 via ECMO. Also note that the calculated shunt fraction increases with increasing  $P_vO_2$ , but this  
116 metric may be misleading because the shunted blood is actually oxygenated.

117 **Supplementary Figures**

118

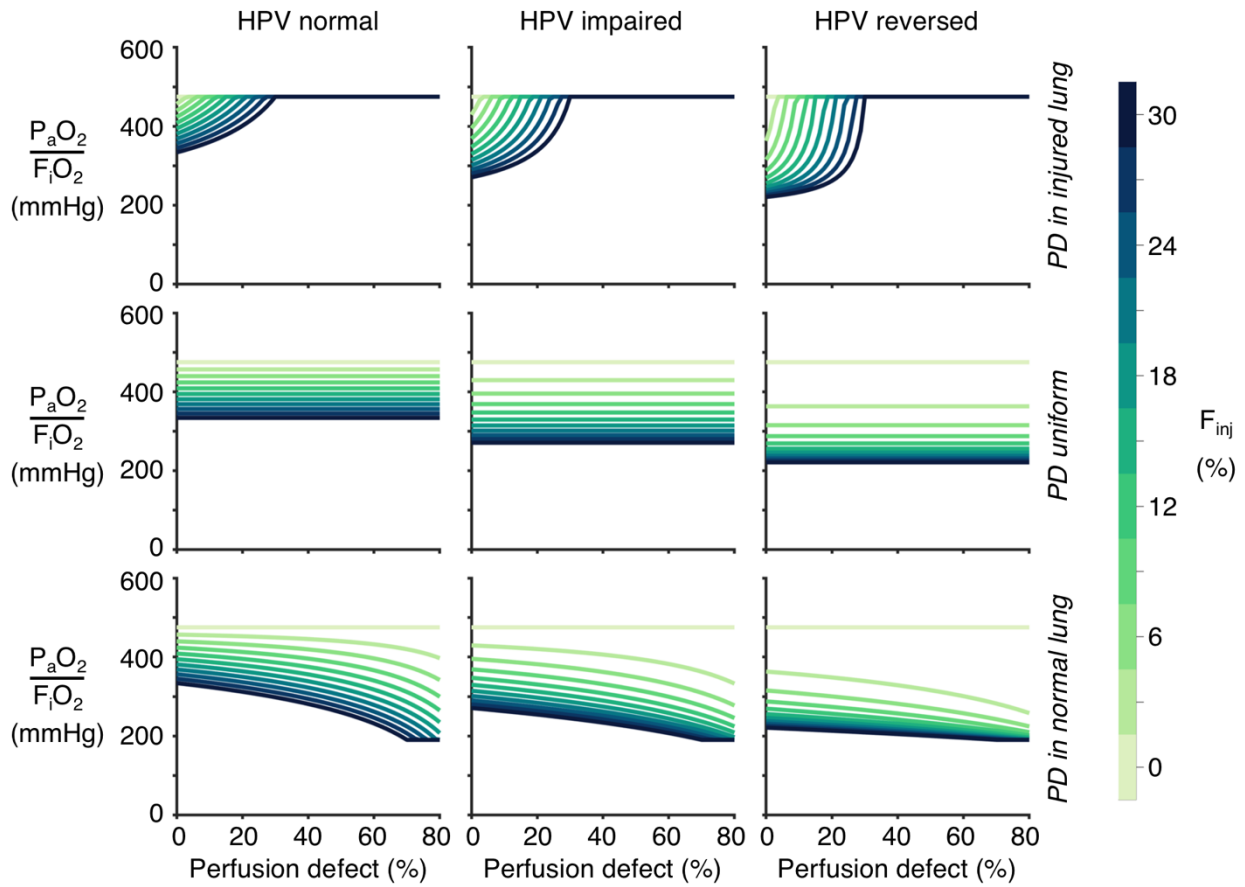

119

120 **Supplementary Figure 1.** Effect of perfusion defect (PD) on the ratio of arterial oxygen tension  
 121 ( $P_aO_2$ ) to inspired oxygen fraction ( $F_iO_2$ ) in the early stage model. Columns correspond to  
 122 alterations in hypoxic pulmonary vasoconstriction (HPV). Rows correspond to the distribution  
 123 of perfusion defect. Color indicates the fraction of injured lung ( $F_{inj}$ ). In all cases,  $F_iO_2$  was  
 124 21%, mixed venous oxygen tension was 40 mmHg, baseline perfusion gradient was 30%,  
 125 reversed HPV was modeled with 72% reduction of vascular resistance in injured regions, and  
 126 there was no assumed ventilation-perfusion mismatching in the noninjured lung.

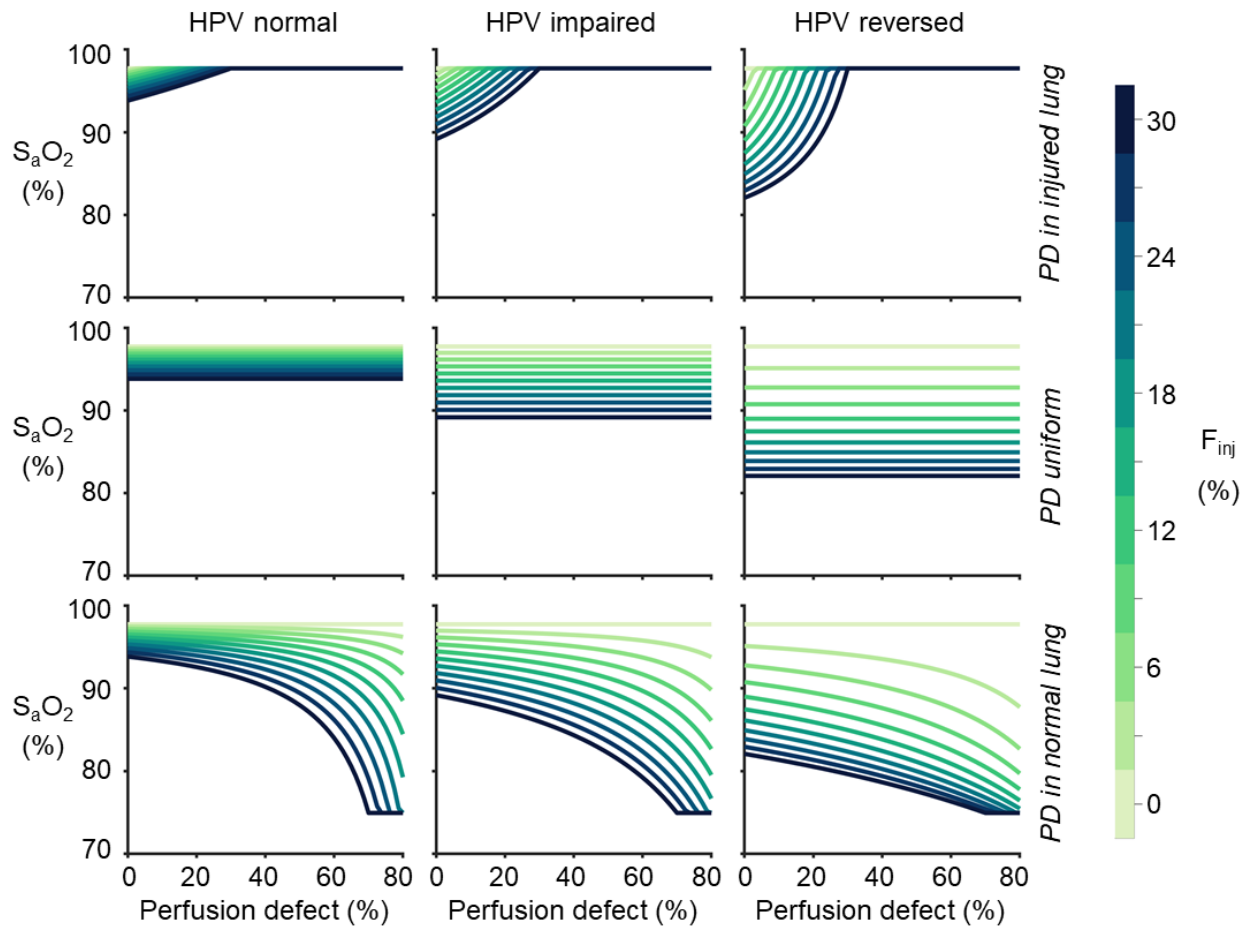

127

128 **Supplementary Figure 2.** Effect of perfusion defect (PD) on arterial oxygen saturation of  
 129 hemoglobin ( $S_aO_2$ ) in the early stage model. Columns correspond to alterations in hypoxic  
 130 pulmonary vasoconstriction (HPV). Rows correspond to the distribution of perfusion defect.  
 131 Color indicates the fraction of injured lung ( $F_{inj}$ ). In all cases,  $F_iO_2$  was 21%, mixed venous  
 132 oxygen tension was 40 mmHg, baseline perfusion gradient was 30%, reversed HPV was  
 133 modeled with 72% reduction of vascular resistance in injured regions, and there was no assumed  
 134 ventilation-perfusion mismatching in the noninjured lung.



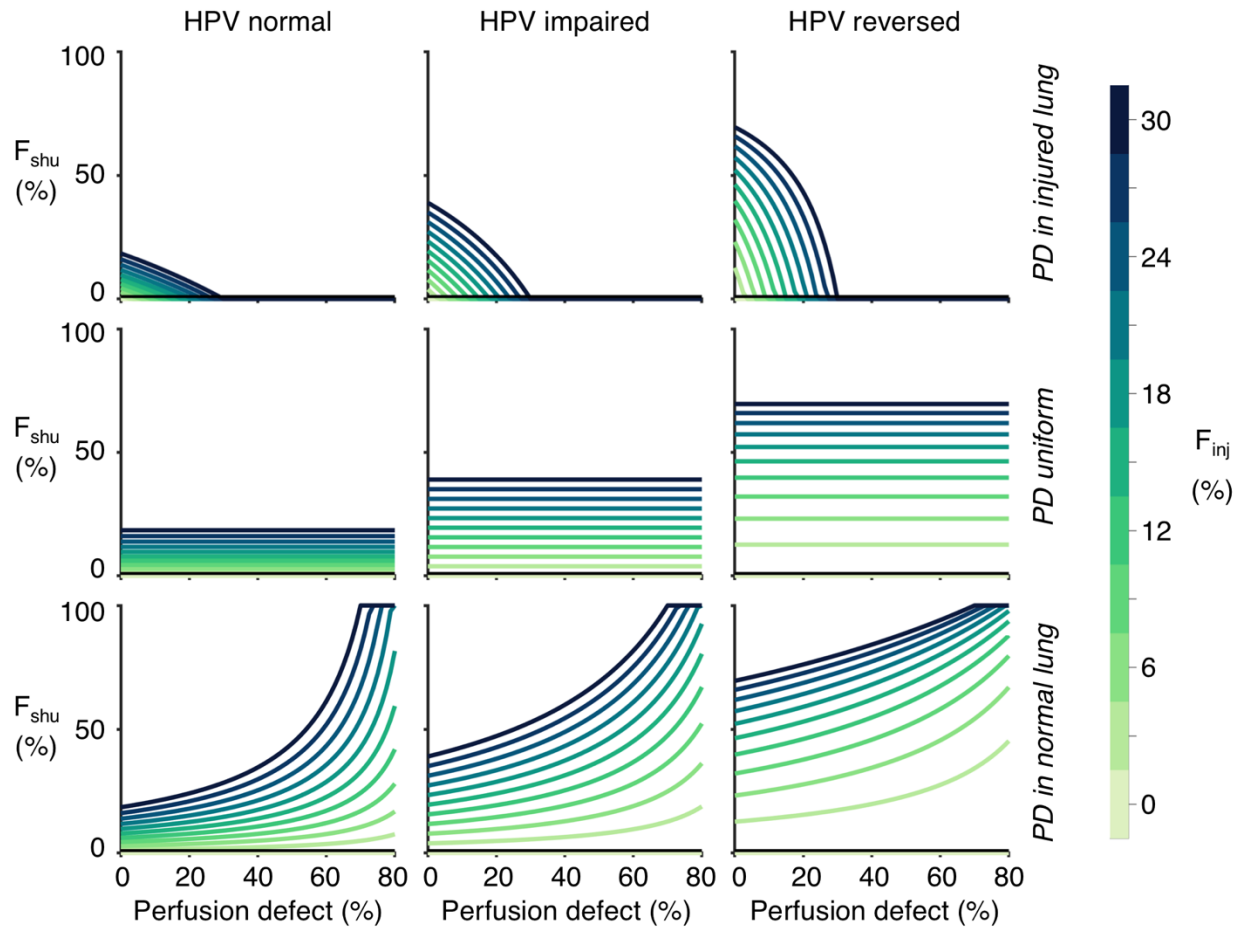

135

136 **Supplementary Figure 3.** Effect of perfusion defect (PD) on the calculated shunt fraction ( $F_{shu}$ )  
 137 in the early stage model. Columns correspond to alterations in hypoxic pulmonary  
 138 vasoconstriction (HPV). Rows correspond to the distribution of perfusion defect. Color  
 139 indicates the fraction of injured lung ( $F_{inj}$ ). In all cases,  $F_iO_2$  was 21%, mixed venous oxygen  
 140 tension was 40 mmHg, baseline perfusion gradient was 30%, reversed HPV was modeled with  
 141 72% reduction of vascular resistance in injured regions, and there was no assumed ventilation-  
 142 perfusion mismatching in the noninjured lung.

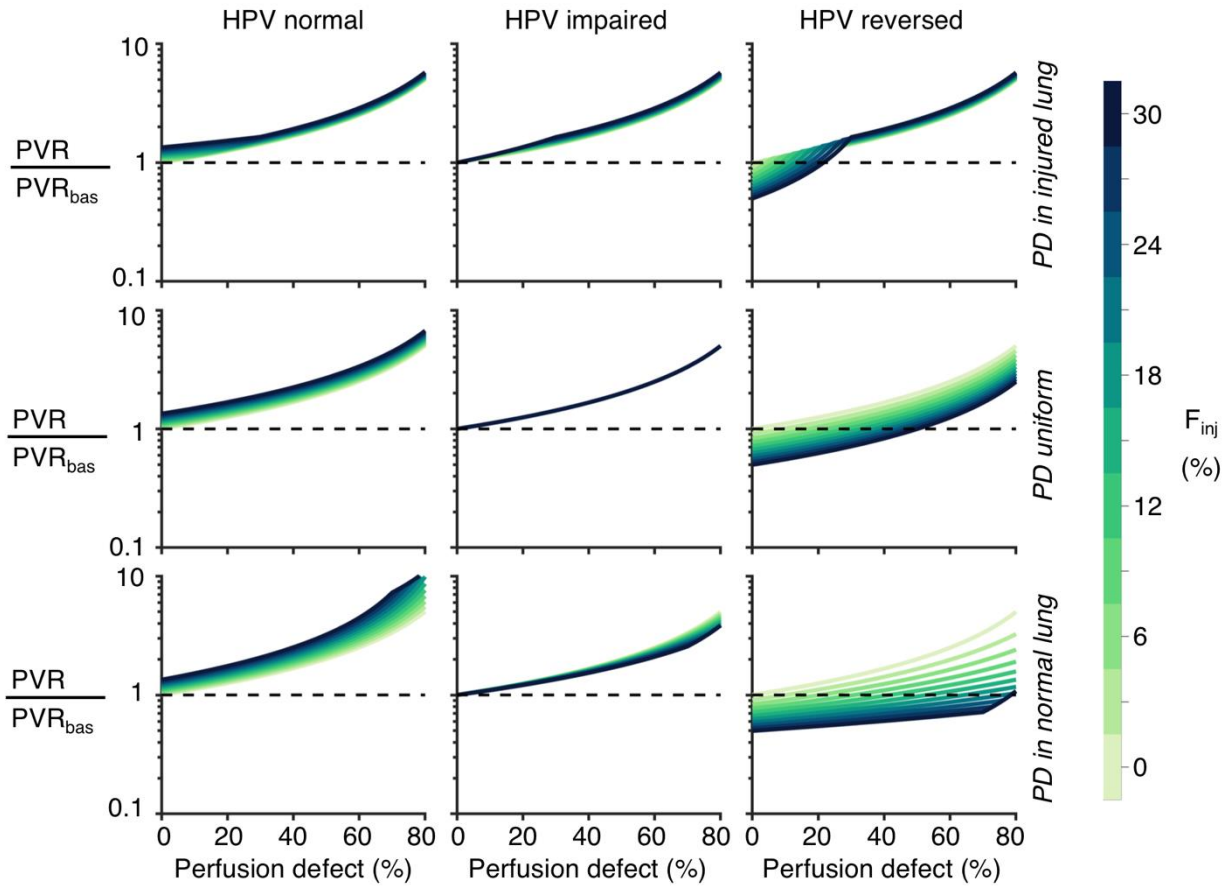

143

144 **Supplementary Figure 4.** Effect of perfusion defect (PD) on the total pulmonary vascular  
 145 resistance (PVR) relative to the baseline value ( $PVR_{bas}$ ) in the early stage model. The dashed  
 146 line indicates no change relative to baseline. Columns correspond to alterations in hypoxic  
 147 pulmonary vasoconstriction (HPV). Rows correspond to the distribution of perfusion defect.  
 148 Color indicates the fraction of injured lung ( $F_{inj}$ ). In all cases,  $F_{iO_2}$  was 21%, mixed venous  
 149 oxygen tension was 40 mmHg, baseline perfusion gradient was 30%, reversed HPV was  
 150 modeled with 72% reduction of vascular resistance in injured regions, and there was no assumed  
 151 ventilation-perfusion mismatching in the noninjured lung.

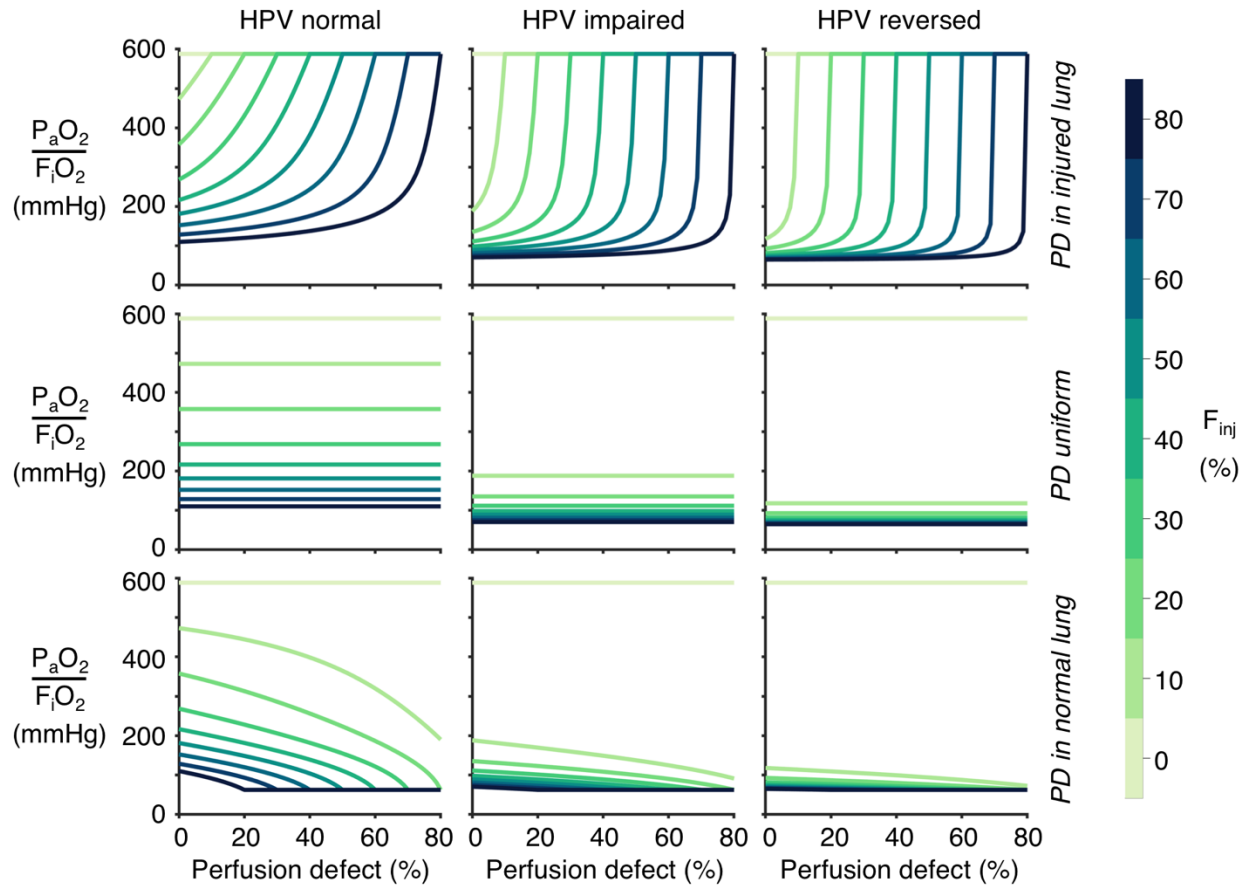

152

153 **Supplementary Figure 5.** Effect of perfusion defect (PD) on the ratio of arterial oxygen tension  
 154 ( $P_aO_2$ ) to inspired oxygen fraction ( $F_iO_2$ ) in the late stage model. Columns correspond to  
 155 alterations in hypoxic pulmonary vasoconstriction (HPV). Rows correspond to the distribution  
 156 of perfusion defect. Color indicates the fraction of injured lung ( $F_{inj}$ ). In all cases,  $F_iO_2$  was  
 157 40%, mixed venous oxygen tension was 25 mmHg, baseline perfusion gradient was 30%,  
 158 reversed HPV was modeled with 72% reduction of vascular resistance in injured regions, and  
 159 there was no assumed ventilation-perfusion mismatching in the noninjured lung.

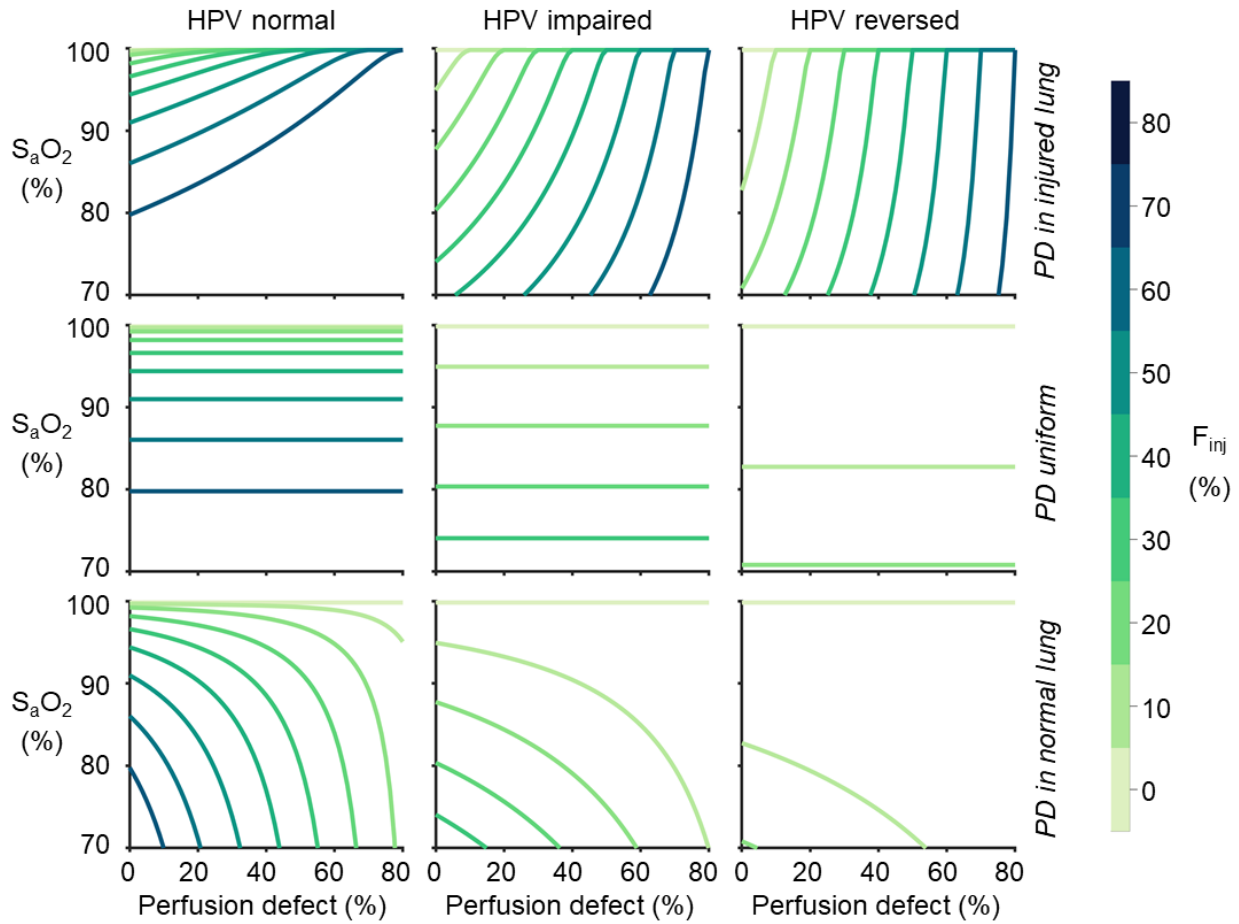

160

161 **Supplementary Figure 6.** Effect of perfusion defect (PD) on arterial oxygen saturation of  
 162 hemoglobin ( $S_{aO_2}$ ) in the late stage model. Columns correspond to alterations in hypoxic  
 163 pulmonary vasoconstriction (HPV). Rows correspond to the distribution of perfusion defect.  
 164 Color indicates the fraction of injured lung ( $F_{inj}$ ). In all cases,  $F_iO_2$  was 40%, mixed venous  
 165 oxygen tension was 25 mmHg, baseline perfusion gradient was 30%, reversed HPV was  
 166 modeled with 72% reduction of vascular resistance in injured regions, and there was no assumed  
 167 ventilation-perfusion mismatching in the noninjured lung. Note that only  $S_{aO_2}$  above 70% are  
 168 shown.

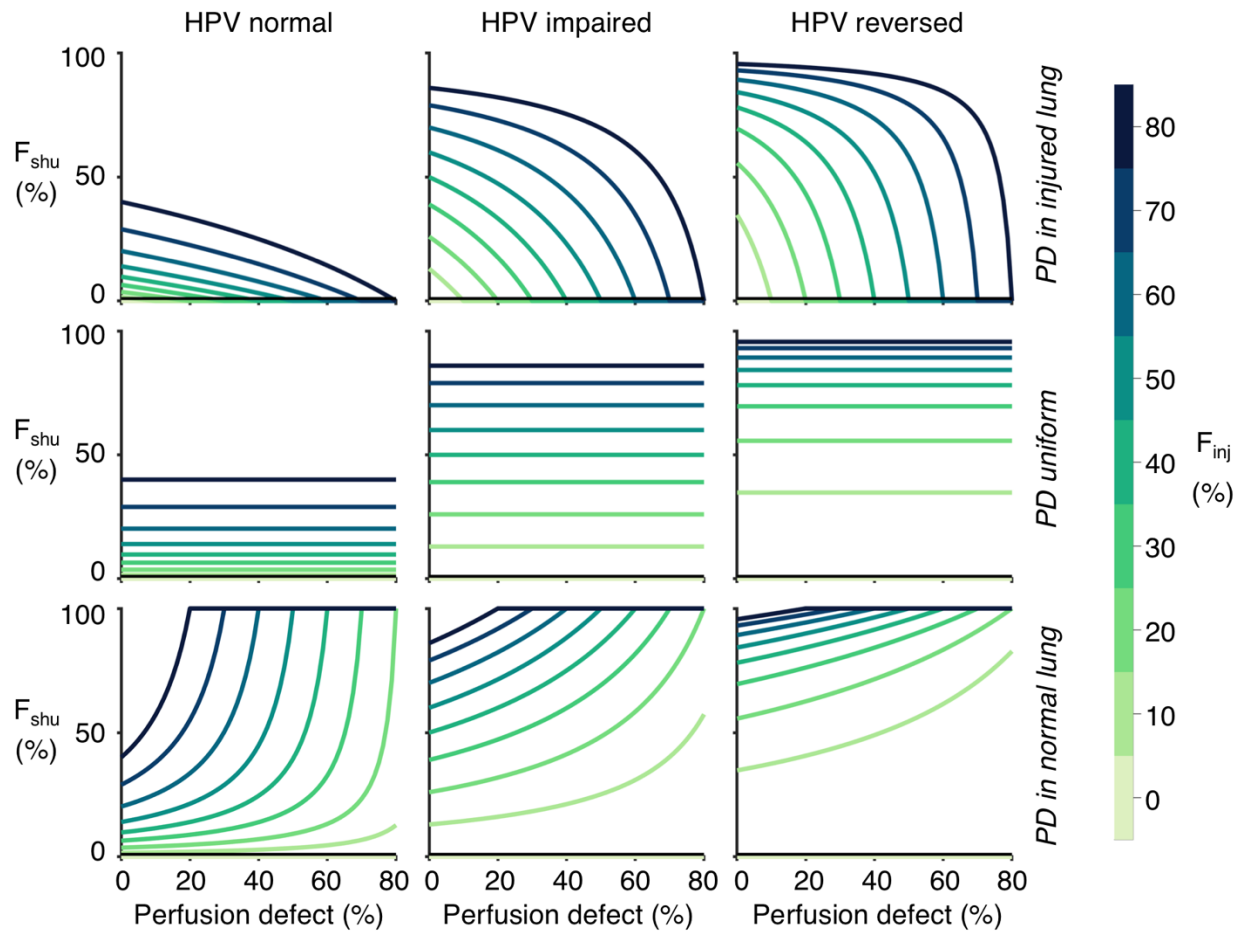

169

170 **Supplementary Figure 7.** Effect of perfusion defect (PD) on calculated shunt fraction ( $F_{shu}$ ) in  
 171 the late stage model. Columns correspond to alterations in hypoxic pulmonary vasoconstriction  
 172 (HPV). Rows correspond to the distribution of perfusion defect. Color indicates the fraction of  
 173 injured lung ( $F_{inj}$ ). In all cases,  $F_iO_2$  was 40%, mixed venous oxygen tension was 25 mmHg,  
 174 baseline perfusion gradient was 30%, reversed HPV was modeled with 72% reduction of  
 175 vascular resistance in injured regions, and there was no assumed ventilation-perfusion  
 176 mismatching in the noninjured lung.

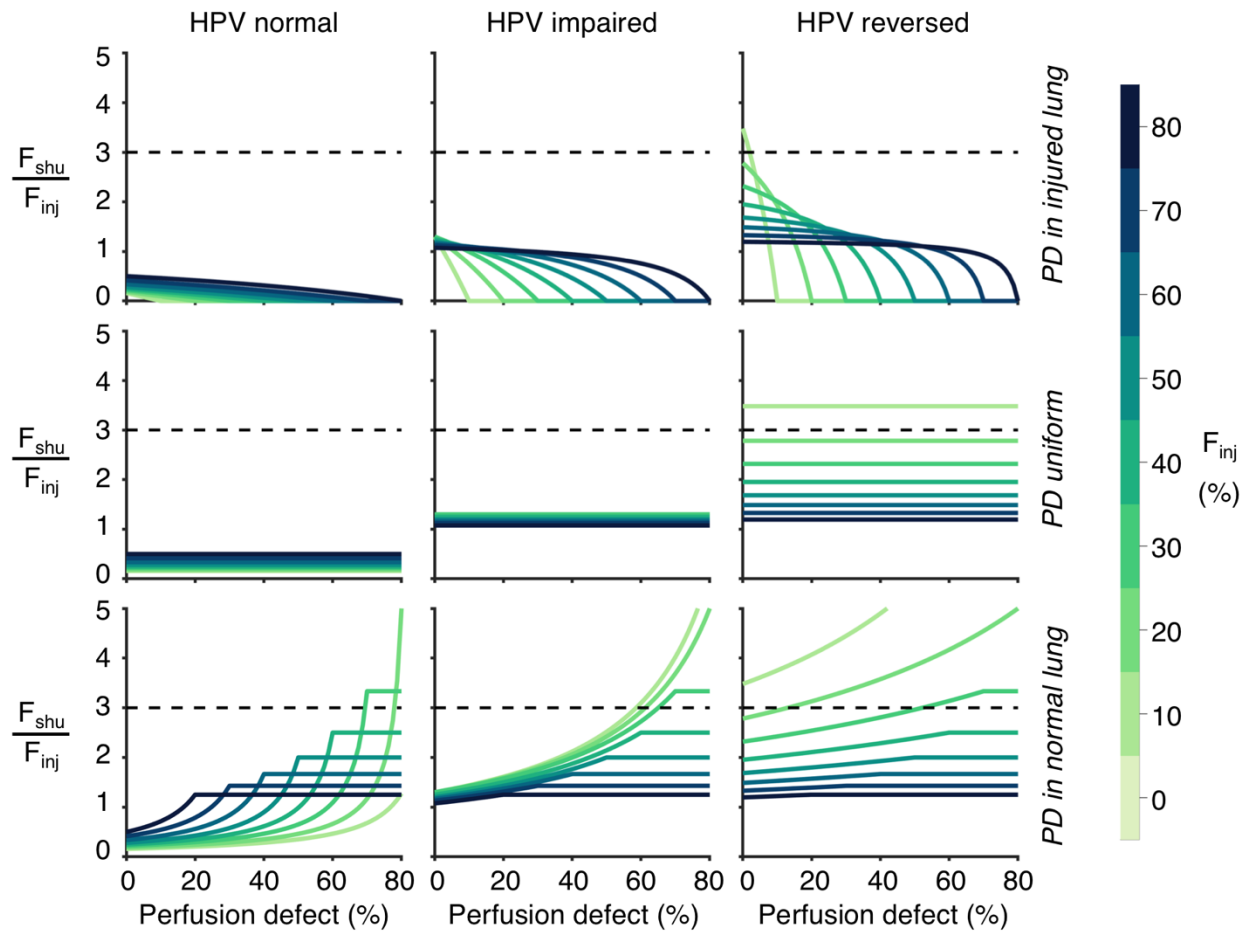

177

178 **Supplementary Figure 8.** Effect of perfusion defect (PD) on the ratio of calculated shunt  
 179 fraction ( $F_{shu}$ ) to injured fraction ( $F_{inj}$ ) in the late stage model. The dashed line indicates a ratio  
 180 of  $F_{shu}:F_{inj} = 3$ , reported in early COVID-19 patients. Columns correspond to alterations in  
 181 hypoxic pulmonary vasoconstriction (HPV). Rows correspond to the distribution of perfusion  
 182 defect. Color indicates the fraction of injured lung ( $F_{inj}$ ). In all cases,  $F_iO_2$  was 40%, mixed  
 183 venous oxygen tension was 25 mmHg, baseline perfusion gradient was 30%, reversed HPV was  
 184 modeled with 72% reduction of vascular resistance in injured regions, and there was no assumed  
 185 ventilation-perfusion mismatching in the noninjured lung.

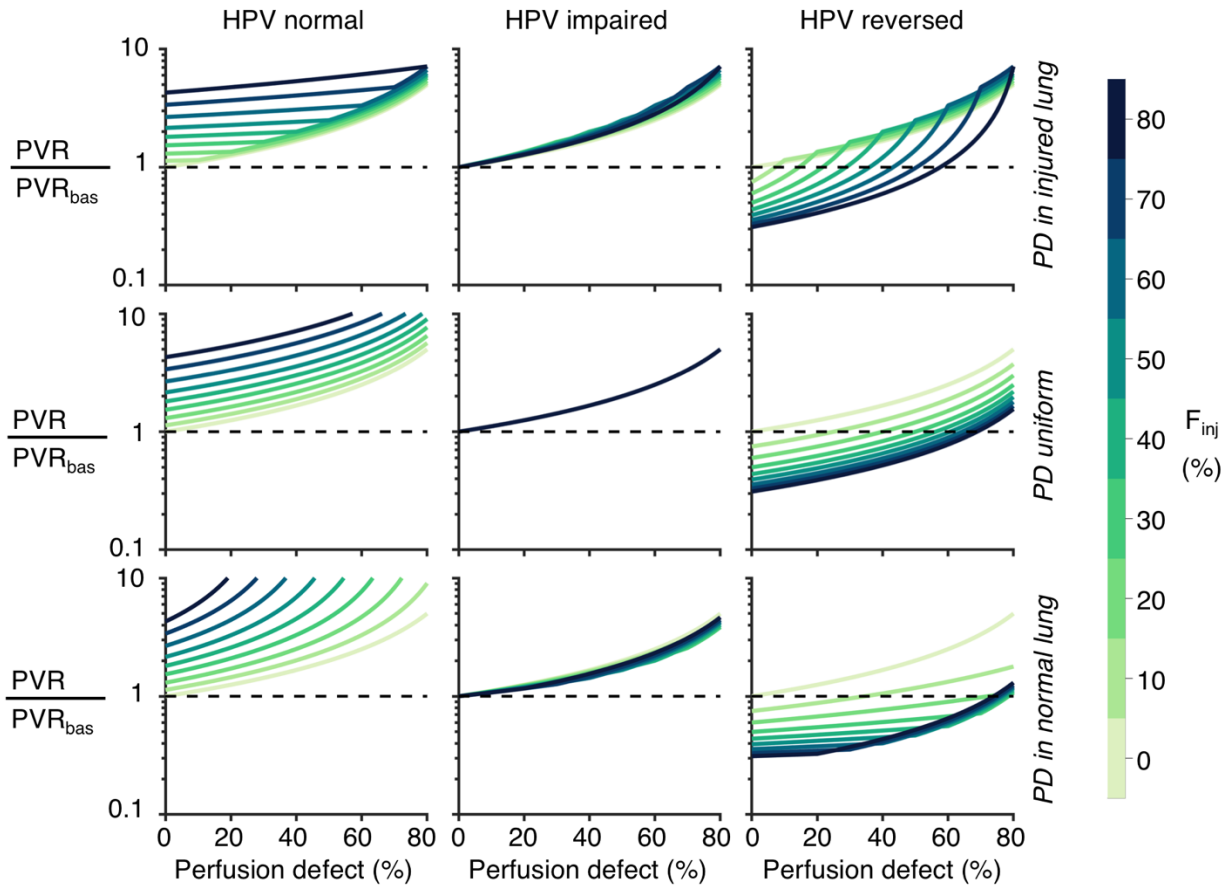

186

187 **Supplementary Figure 9.** Effect of perfusion defect (PD) on the total pulmonary vascular  
 188 resistance (PVR) relative to the baseline value ( $PVR_{bas}$ ) in the late stage model. The dashed line  
 189 indicates no change relative to baseline. Columns correspond to alterations in hypoxic  
 190 pulmonary vasoconstriction (HPV). Rows correspond to the distribution of perfusion defect.  
 191 Color indicates the fraction of injured lung ( $F_{inj}$ ). In all cases,  $F_iO_2$  was 40%, mixed venous  
 192 oxygen tension was 25 mmHg, baseline perfusion gradient was 30%, reversed HPV was  
 193 modeled with 72% reduction of vascular resistance in injured regions, and there was no assumed  
 194 ventilation-perfusion mismatching in the noninjured lung.

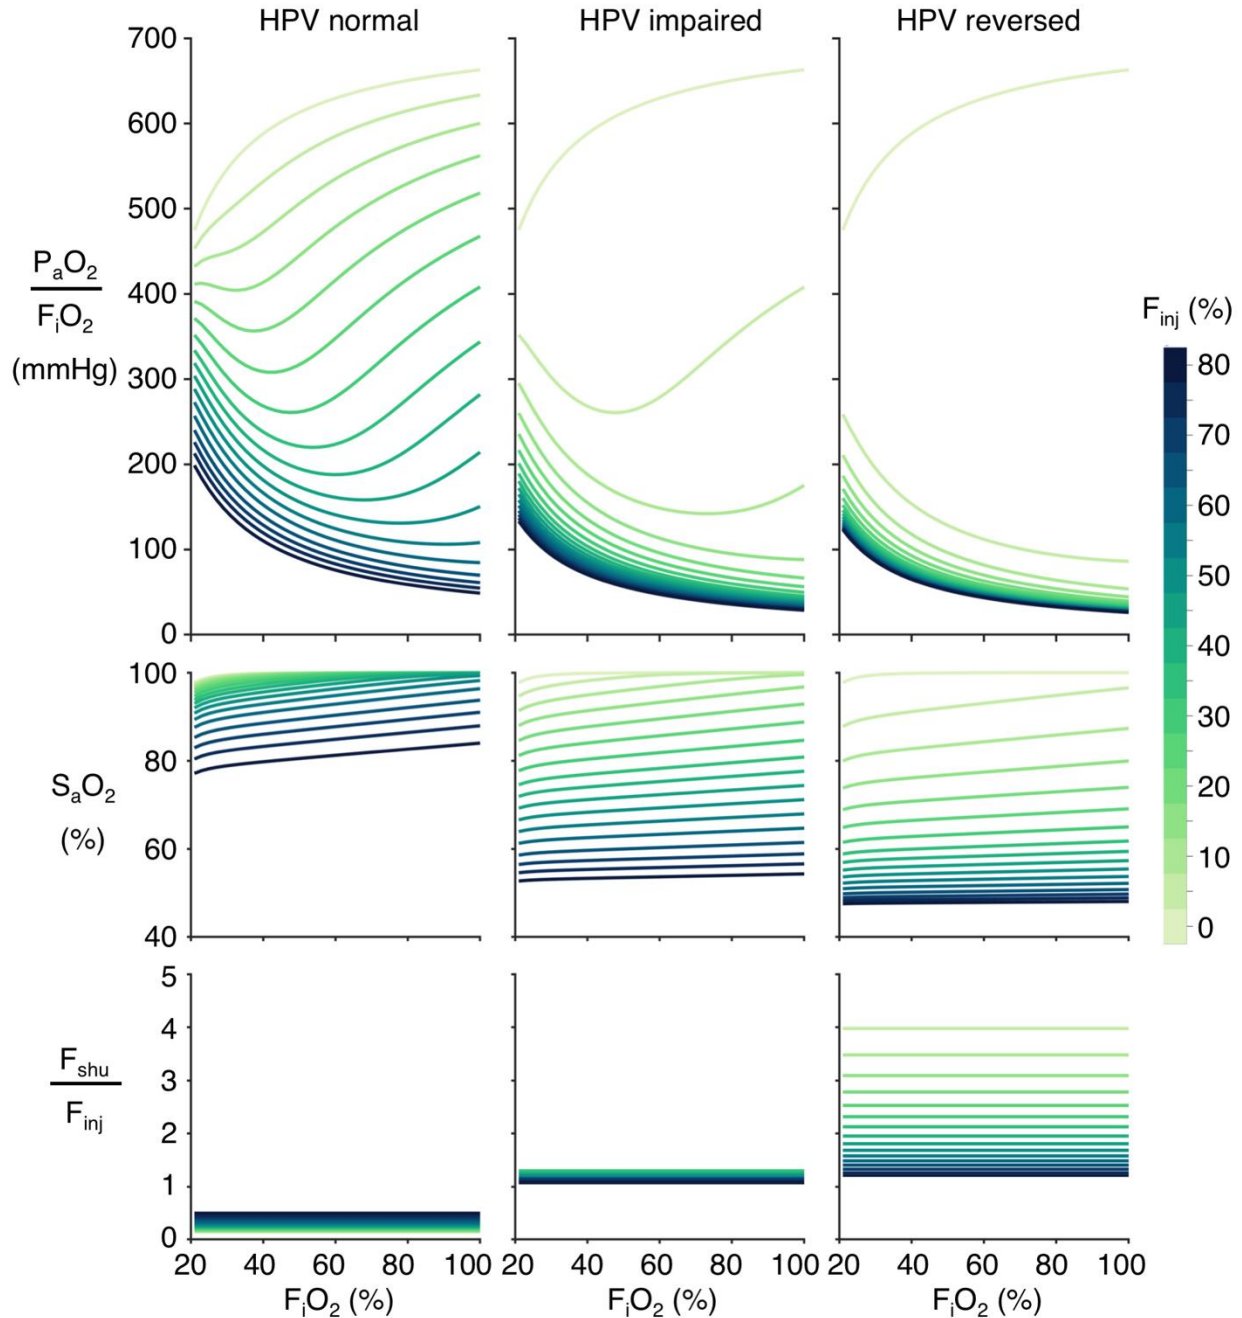

195

196 **Supplementary Figure 10.** Nonlinear dependence of arterial oxygenation on inspired oxygen  
 197 fraction ( $F_I O_2$ ) and injured lung fraction ( $F_{inj}$ ). Columns correspond to type of hypoxic  
 198 pulmonary vasoconstriction (HPV) modification. Rows correspond to the ratio of arterial oxygen  
 199 tension to inspired oxygen fraction ( $P_a O_2:F_I O_2$ ), arterial oxygen saturation of hemoglobin ( $S_a O_2$ ),  
 200 and ratio of shunt fraction to injured fraction ( $F_{shu}:F_{inj}$ ). In all cases, mixed venous oxygen  
 201 tension ( $P_v O_2$ ) was 25 mmHg was 17%,  $F_I O_2$  was 60%, baseline perfusion gradient was 30%,  
 202 and reversed HPV was modeled with 72% reduction of vascular resistance in injured regions.



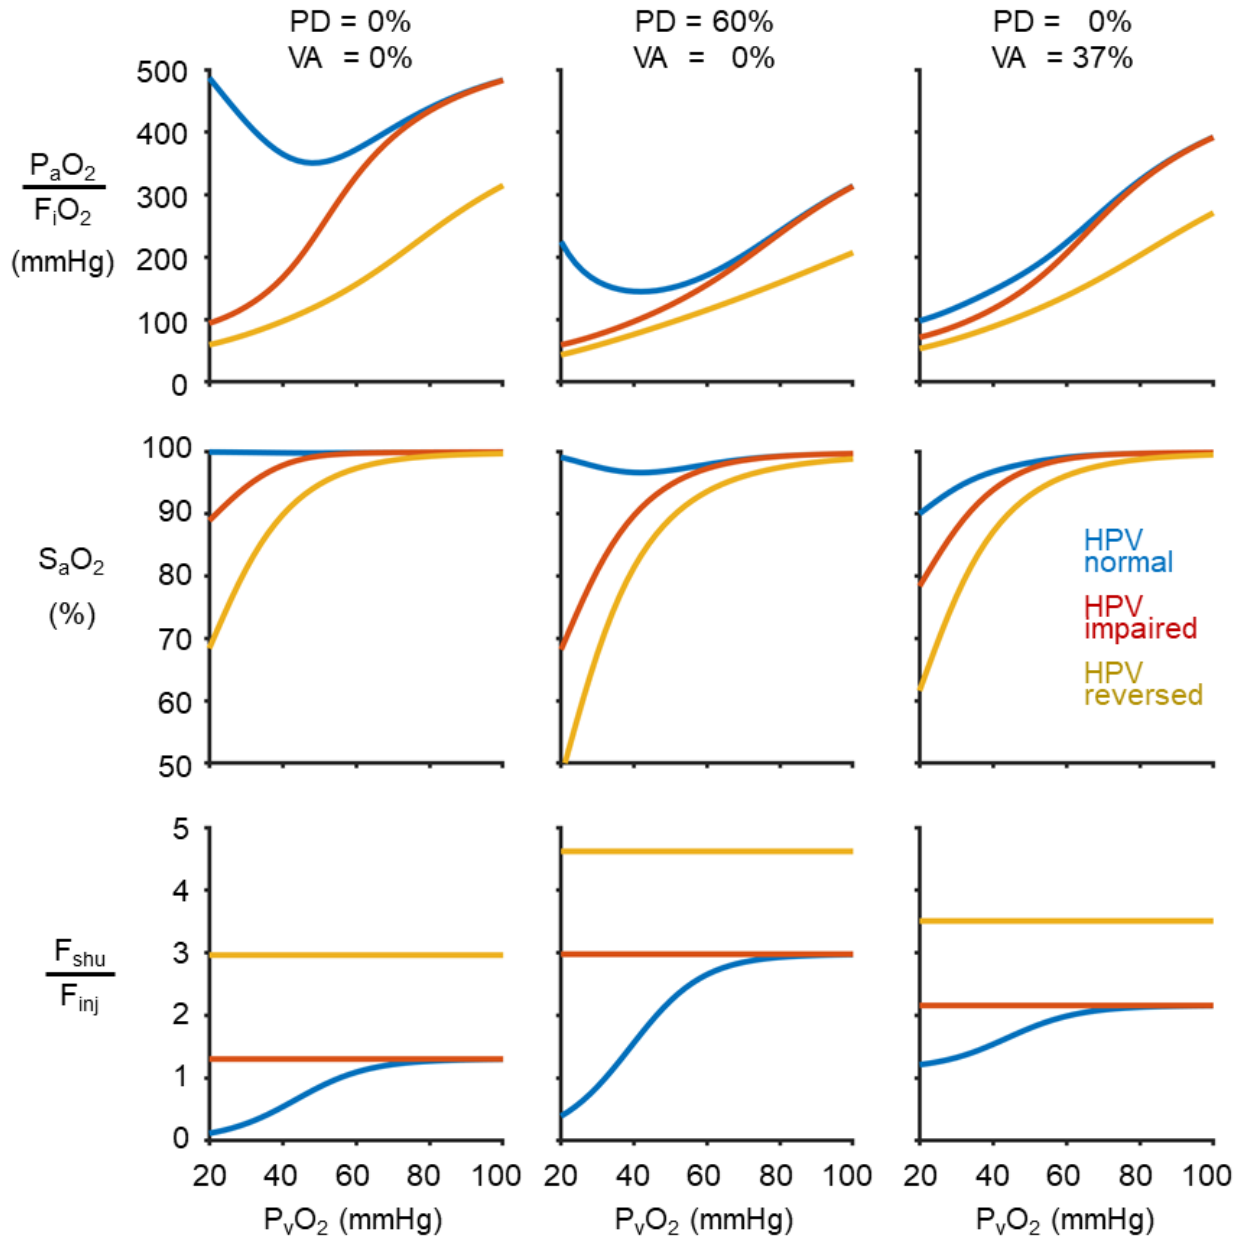

203

204 **Supplementary Figure 11.** Interplay between mixed venous oxygen tension ( $P_{vO_2}$ ) and  
 205 alterations in hypoxic pulmonary vasoconstriction (HPV). Type of HPV modification is  
 206 indicated by color (blue: normal; red: impaired; yellow: reversed). Rows correspond to the ratio  
 207 of arterial oxygen tension to inspired oxygen fraction ( $P_{aO_2}:F_{iO_2}$ ), arterial oxygen saturation of  
 208 hemoglobin ( $S_{aO_2}$ ), and ratio of shunt fraction to injured fraction ( $F_{shu}:F_{inj}$ ). Columns correspond  
 209 to three different cases of perfusion defect (PD) and venous admixture (VA) affecting the  
 210 noninjured lung compartments. In all cases, the injured fraction ( $F_{inj}$ ) was 17%,  $F_{iO_2}$  was 60%,  
 211 baseline perfusion gradient was 30%, and reversed HPV was modeled with 72% reduction of  
 212 vascular resistance in injured regions.

213

## 214 **Supplementary Code**

### 215 Code Description

216         This readme file describes a Matlab script `hpv_impairment_model.m` written for the  
217 purpose of simulating a simple mathematical model of perfusion and gas exchange, with  
218 particular emphasis on possible alterations to hypoxic pulmonary vasoconstriction, perfusion  
219 defects, and ventilation-perfusion mismatching suspected in patients with the novel coronavirus.  
220 The script `hpv_impairment_model.m` can be executed from the command window. Input  
221 parameters at the top of the script file can be modified. Comments next to each input parameter  
222 describe its functional meaning in the model. The output is assigned to variables at the bottom of  
223 the script file, and can be accessed by name from the command window after executing the  
224 script. Comments next to each output variable describe its meaning in the model. The script can  
225 be executed dynamically/interactively, or it can be converted into a function for batch evaluation.

226         Software tested on a computer running a Windows 10 64-bit operating system, with a 3.5  
227 GHz AMD Ryzen 9 3950X CPU and 64 GB RAM. Matlab version R2020a 64-bit was used,  
228 including the Optimization Toolbox version 8.5. There is no further installation required. No  
229 external data is required. Average execution time for this script was 4 milliseconds on this  
230 machine. For the default values that are included with the distributed version of this code, the  
231 expected output is given below:

```
232         F_shunt =  
233             0.5036  
234  
235         F_shunt_noninjured =  
236             0.1300  
237  
238         F_shunt_to_F_injured =  
239             2.9624  
240  
241         PaO2_to_FiO2 =  
242             248.8098  
243
```

```
244     PVR =
245         1.1826
246
247     PaO2 =
248         52.2500
249
250     SaO2 =
251         0.8654
252
```

253 Code License

254 This code is provided under the GNU General Public License version 3 or any later  
255 version.

256 Code

```
257 % hpv_impairment_model.m
258 % Model of Gas Exchange with Altered Hypoxic Pulmonary Vasoconstriction,
259 % Perfusion Defect, and Ventilation-Perfusion Mismatching
260 % Copyright (C) <2020> <Jacob Herrmann>
261 %
262 % This program is free software: you can redistribute it and/or modify
263 % it under the terms of the GNU General Public License as published by
264 % the Free Software Foundation, either version 3 of the License, or
265 % (at your option) any later version.
266 %
267 % This program is distributed in the hope that it will be useful,
268 % but WITHOUT ANY WARRANTY; without even the implied warranty of
269 % MERCHANTABILITY or FITNESS FOR A PARTICULAR PURPOSE. See the
270 % GNU General Public License for more details.
271 %
272 % You should have received a copy of the GNU General Public License
273 % along with this program. If not, see <http://www.gnu.org/licenses/>.
274 %
275
276 % _____ %
277 % ___ INPUT PARAMETERS _____ %
278
279 % baseline perfusion gradient (unitless)
280 % defined as half the range of perfusion divide by the average
281 Q_baseline_gradient = 0.30 ;
282
283 % total fraction of injured lung (unitless)
284 F_injured = 0.17 ;
285
286 % type of injury distribution
287 % - "lower" focuses injury only in the region with the highest baseline perfusion
288 % - "middle" focuses injury only in the middle "height" level
289 % - "upper" focuses injury only in the region with the lowest baseline perfusion
290 % - "uniform" distribute an equal injured fraction to each "height" level
291 F_injured_distribution_type = 'lower' ;
```

```

292
293 % total fraction of perfusion defect or alveolar deadspace (unitless)
294 F_deadspace = 0.40 ;
295
296 % differential probability of alveolar deadspace occurring in injured
297 % vs. noninjured compartments (unitless)
298 F_deadspace_injured = 0.00 ;
299
300 % type of hypoxic pulmonary vasoconstriction in the injured
301 % lung regions.
302 % - for "normal" function, HPV causes exponentially increasing resistance
303 % below a threshold of oxygen tension.
304 % - for "impaired" function, HPV is absent, there is no response to changes
305 % in oxygen tension.
306 % - for "reversed" function, HPV is not only absent, but instead there is a
307 % reduction in resistance in injured regions, regardless of oxygenation
308 hpv_type = 'reversed' ;
309
310 % fractional reduction of vascular resistance in the injured
311 % lung regions (unitless). note that this parameter only applies
312 % to the HPV reversed model.
313 injured_R_reduction = 0.50 ;
314
315 % fractional equilibration between alveolar and end-capillary
316 % gas tensions in the injured and noninjured lung regions (unitless).
317 O2_equilibration_injured = 0.05 ;
318
319 % venous admixture (shunt fraction) in blood leaving the noninjured lung
320 % compartments, resulting from ventilation-perfusion mismatching. note that
321 % this specified value is only effective at 21% inspired oxygen. the effective
322 % noninjured venous admixture will be linearly reduced to zero as inspired
323 % oxygen fraction increases from 21% to 100%.
324 F_shunt_noninjured_21 = 0.13 ;
325
326 % _____ %
327 %___ OTHER PARAMETERS _____ %
328
329 % fraction of inspired oxygen (unitless)
330 FiO2 = 0.21 ;
331
332 % partial pressure of oxygen in mixed venous blood (mmHg)
333 PvO2 = 40 ;
334
335 % water vapor partial pressure (mmHg)
336 PH2O = 47 ;
337
338 % partial pressure of carbon dioxide in arterial blood (mmHg)
339 PaCO2 = 40 ;
340
341 % respiratory quotient (unitless)
342 respiratory_quotient = 0.8 ;
343
344 % hemoglobin concentration in blood (g /dL)
345 hemoglobin = 14 ;
346

```

```

347 % _____ %
348 % _____ MATHEMATICAL MODEL _____ %
349
350 % solve for the average steady state partial pressure of oxygen
351 % in normal alveolar gas using the alveolar gas equation.
352 PAO2 = FiO2*(760-PH2O) - (PaCO2/respiratory_quotient) ;
353
354 % function for oxygen saturation of hemoglobin (unitless),
355 % given input parameter partial pressure of oxygen
356 % using a regression provided by Severinghaus 1979.
357 % https://www.ncbi.nlm.nih.gov/pubmed/35496
358 S_O2 = @(P_O2) 1./ ( 1 + 23400./(power(P_O2,3)+150*P_O2) ) ;
359
360 % oxygen content equation (dL O2 /dL blood), also
361 % provided by Severinghaus 1979.
362 % https://www.ncbi.nlm.nih.gov/pubmed/35496
363 C_O2 = @(P_O2,S_O2) bsxfun(@plus, 1.34*hemoglobin*S_O2 , 0.0031*P_O2 ) ;
364
365 % oxygen saturation and blood content in mixed-venous blood and
366 % in end-capillary blood from an ideal well-aerated
367 % compartment of the lung
368 SvO2 = S_O2( PvO2 ) ;
369 CvO2 = C_O2( PvO2 , SvO2 ) ;
370 ScO2_aerated = S_O2( PAO2 ) ;
371 CcO2_aerated = C_O2( PAO2 , ScO2_aerated ) ;
372
373 % linearly reduce venous admixture caused by V/Q mismatching as
374 % inspired oxygen fraction increases from 21% to 100%
375 F_shunt_noninjured = F_shunt_noninjured_21 * (1.00-FiO2)/(1.00-0.21) ;
376
377 % find the fractional equilibration of oxygen required to
378 % produce a specified amount of venous admixture specifically from
379 % the noninjured lung compartment
380 PcO2_noninjured = @(B) PvO2 + B*(PAO2-PvO2) ;
381 CcO2_noninjured = @(B) C_O2( PcO2_noninjured(B) , S_O2(PcO2_noninjured(B)) ) ;
382 Fshu_noninjured_estimate = @(B) (CcO2_aerated-CcO2_noninjured(B)) / ...
383     (CcO2_aerated-CvO2) ;
384 error_Fshu_noninjured = @(B) power( Fshu_noninjured_estimate(B) - ...
385     F_shunt_noninjured ,2) ;
386 options = optimoptions('fmincon','Display','none') ;
387 O2_equilibration_noninjured = fmincon( ...
388     error_Fshu_noninjured , ...
389     1.0-F_shunt_noninjured , ...
390     [],[],[],[],0.0,1.0,[],options) ;
391
392 % determine the injured fraction of each "height" level, based on
393 % the total fractional lung injury and the type of injury distribution.
394 switch F_injured_distribution_type
395     case 'lower' ; F_injured_height = [0,0,1] ;
396     case 'middle' ; F_injured_height = [0,1,0] ;
397     case 'upper' ; F_injured_height = [1,0,0] ;
398     case 'uniform' ; F_injured_height = [1,1,1]/3 ;
399 end
400 F_injured_height = 3 * F_injured_height * F_injured ;
401 F_injured_height = max(0,min(1, F_injured_height )) ;

```

```

402 if abs( F_injured - sum(F_injured_height)/3 ) > 0.01
403     disp(['Warning: More than 1% deviation between specified injured fraction' ...
404         ' and sum of regional injured fractions.'])
405 end
406
407 % define the regional response of hypoxic pulmonary vasoconstriction
408 % within the injured compartments of the model.
409 % - for "normal" function, HPV causes exponentially increasing resistance
410 % below a threshold of oxygen tension.
411 % - for "impaired" function, HPV is absent, there is no response to changes
412 % in oxygen tension.
413 % - for "reversed" function, HPV is not only absent, but instead there is a
414 % reduction in resistance in injured regions, regardless of oxygenation
415 hpv_threshold = 50 ;
416 switch hpv_type
417     case 'normal' ; hpv = @(x,injured) 1 + 100.*exp(-x/(0.2*hpv_threshold)) ;
418     case 'impaired' ; hpv = @(x,injured) ones(size(x)) ;
419     case 'reversed' ; hpv = @(x,injured) ones(size(x)) - (1-
420 injured_R_reduction)*injured ;
421 end
422
423 % determine how to partition the alveolar deadspace, with a differential
424 % probability of occurring in injured vs. noninjured compartments. Note that
425 % the total deadspace fraction will be ensured, but these probabilities may
426 % not be preserved. A warning will be displayed.
427 if (F_injured<eps()) || (F_deadspace_injured<eps())
428     tmp2 = 0.0 ;
429     tmp1 = 1.0 ;
430 else
431     ratio = ((1-F_deadspace_injured)/F_deadspace_injured) * ((1-
432 F_injured)/F_injured) ;
433     tmp2 = 1/(1+ratio) ;
434     tmp1 = 1 - tmp2 ;
435 end
436 if (tmp1*F_deadspace) > (1-F_injured)
437     disp('Warning: Deadspace could not be split as desired.')
438     tmp2 = tmp2 + (tmp1-(1-F_injured)/F_deadspace) ;
439     tmp1 = (1-F_injured)/F_deadspace ;
440 elseif (tmp2*F_deadspace) > F_injured
441     disp('Warning: Deadspace could not be split as desired.')
442     tmp1 = tmp1 + (tmp2-F_injured/F_deadspace) ;
443     tmp2 = F_injured/F_deadspace ;
444 end
445 F_deadspace_compartment = F_deadspace * [ tmp1 , tmp2 ] ;
446 clear tmp1 tmp2
447
448 % fraction of total lung represented by each of the 12 compartments (unitless).
449 % - rows (1st index) correspond to "height" levels
450 % - columns (2nd index) correspond to (noninjured, injured) compartments
451 % - layers (3rd index) correspond to (perfused, deadspace) compartments
452 tmp3 = (1/3) * cat(2, 1-F_injured_height , F_injured_height ) ;
453 if F_injured < eps()
454     tmp4 = tmp3 ;
455 elseif (1-F_injured) < eps()
456     tmp4 = tmp3 ;

```

```

457 else
458     tmp4 = bsxfun(@rdivide, tmp3 , [1-F_injured,F_injured] ) ;
459 end
460 tmp5 = bsxfun(@times, tmp4 , F_deadspace_compartment ) ;
461 F_compartment = cat(3, tmp3-tmp5 , tmp5 ) ;
462 clear tmp3 tmp4 tmp5
463
464 % boolean value representing whether a compartment is injured (true)
465 % or normal (false).  rows, columns, and layers have the same meaning as F.
466 injured = repmat( [false,true] ,[3,1,2]) ;
467
468 % equilibration between alveolar and end-capillary gas tension (unitless).
469 % - normal compartment may have some venous admixture due to V/Q mismatching.
470 % - injured compartment has little or no equilibration.
471 O2_equilibration = (~injured*O2_equilibration_noninjured) +
472 (injured*O2_equilibration_injured) ;
473
474 % end-capillary partial pressure of oxygen in each compartment (mmHg)
475 % is assumed to be a weighted average of mixed venous oxygen tension
476 % and alveolar oxygen tension.
477 PcO2 = PvO2 + O2_equilibration*( PAO2 - PvO2 ) ;
478
479 % baseline perfusion as a fraction of cardiac output (unitless).
480 % baseline perfusion is computed to ensure a specified baseline
481 % perfusion gradient, BEFORE effects of HPV are considered.
482 % there is only one column, corresponding to each "height" level
483 % before injury.
484 Q_baseline = 1/3 ...
485     + linspace(0,Q_baseline_gradient*2/3,3)' ...
486     - (0.5*Q_baseline_gradient*2/3) ;
487
488 % normalize pulmonary vascular resistance to baseline value (unitless)
489 PVR_baseline = 1 ;
490
491 % baseline resistance at each height level.
492 % these values are determined by the baseline perfusion gradient.
493 % note that this quantity represents a normalized resistance.
494 R_baseline = (PVR_baseline./Q_baseline) ;
495
496 % resistance in each compartment after modifications (unitless),
497 % accounting for effects of altered or normal HPV in injured compartments.
498 R_modified = bsxfun(@times, R_baseline , hpv(PcO2,injured) ) ;
499
500 % set vascular resistance of deadspace compartments to infinite
501 R_modified(:, :,2) = inf ;
502
503 % resistance in each compartment (unitless), accounting for fraction
504 % of lung represented by each compartment.  note that a compartment
505 % representing 0% of the lung will exhibit infinite resistance, ensuring
506 % that no perfusion is received.
507 R = R_modified .* ((1/3)/F_compartment) ;
508
509 % total pulmonary vascular resistance (unitless), normalized by baseline PVR
510 PVR = 1/sum(1./R(:)) ;
511

```

```

512 % perfusion to each compartment (unitless), as a fraction of cardiac output
513 Q = (PVR./R) ;
514
515 % evaluate oxygen saturation and content equations for end-capillary blood
516 % in each compartment.
517 ScO2 = S_O2( PcO2 ) ;
518 CcO2 = C_O2( PcO2 , ScO2 ) ;
519
520 % compute oxygen content in mixed arterial blood by a perfusion-weighted
521 % average of end-capillary oxygen contents across all compartments.
522 CaO2 = sum(reshape( Q.*CcO2 ,[],1)) ;
523
524 % numerically approximate oxygen tension in mixed arterial blood, by ensuring
525 % that the result is consistent with the computed arterial oxygen content.
526 error_CaO2 = @(P) power( CaO2 - (C_O2(P,S_O2(P))) ,2) ;
527 guess_PaO2 = PvO2 ;
528 PaO2 = fminsearch( error_CaO2 , guess_PaO2 ) ;
529 SaO2 = S_O2( PaO2 ) ;
530
531 _____%
532 %___ OUTPUT VARIABLES _____%
533
534 % return the pulmonary shunt fraction (unitless).
535 % this represents the fraction of cardiac output which is nonoxygenated.
536 % note that this calculation compares mixed arterial oxygen context to
537 % the oxygen content in an ideal well-aerated normal compartment.
538 F_shunt = (CcO2_aerated-CaO2)/(CcO2_aerated-CvO2) ;
539
540 % return the PAO2:FiO2 ratio (mmHg).
541 % this represents the severity of hypoxemia.
542 PaO2_to_FiO2 = PaO2 / FiO2 ;
543
544 % return the Fshu:Finj ratio (unitless)
545 F_shunt_to_F_injured = F_shunt / F_injured ;
546
547 % display to command window
548 F_shunt
549 F_shunt_noninjured
550 F_shunt_to_F_injured
551 PaO2_to_FiO2
552 PVR
553 PaO2
554 SaO2

```
